# Supplementary material
Source: Springer Nature journal article supplement (https://www.springermedizin.de/resource/supplementary/12887_2012_675_MOESM2_ESM.pdf/9475462)
Supplement: MOESM2 [file 9475462]

Internal hormone environment of **PUBERTY**,  
**INCLUDING TEMPO AND ONSET** as defined by  
blood and urine testosterone & oestradiol

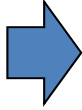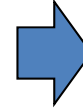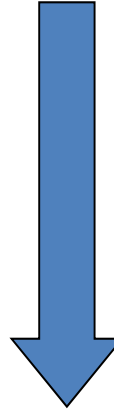

Affected by other events =  
**AETIOLOGICAL FACTORS**  
e.g. genetic background, body weight  
and composition & physical illness

Has an effect on events in adolescence  
= **PREDICTOR**  
e.g. learning, disruptive behaviour,  
unintentional injury, depression

Hormone changes parallel other events in adolescence = **CO-VARIATE**  
e.g. sleep cycle alteration, depression, blood pressure

External influences on adolescence health and wellbeing which act as confounders include socioeconomic status, family and broader environments and external stressors
